# Supplementary material for: Genetic variants in a sodium-dependent vitamin C transporter gene and age-related cataract
Source: PubMed Central journal article supplement (PMC6709767; doi:10.1136/bjophthalmol-2018-312257), 2018-11-15

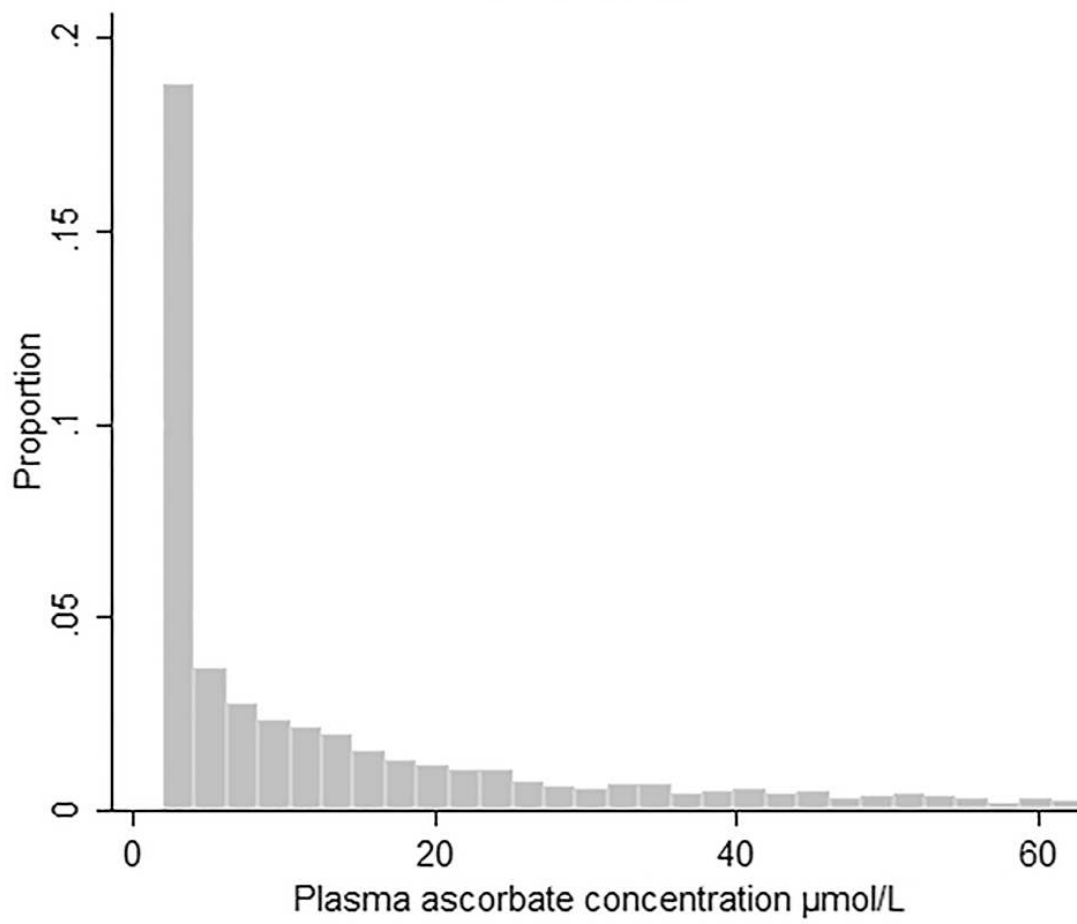

Supplement: bjophthalmol-2018-312257supp001.pdf [file bjophthalmol-2018-312257supp001.pdf]
