# Supplementary material for: Genetic variants in a sodium-dependent vitamin C transporter gene and age-related cataract
Source: PubMed Central journal article supplement (PMC6709767; doi:10.1136/bjophthalmol-2018-312257), 2018-11-15
Supplement: bjophthalmol-2018-312257supp002.pdf [file bjophthalmol-2018-312257supp002.pdf]

**Supplementary Table 2. Characteristics of participants in the India age-related Eye Disease population study (INDEYE) by *SLC23A1* SNP rs33972313**

| Characteristics                                       | <i>SLC23A1</i> SNP rs33972313 |                                 | p-value <sup>2</sup> |
|-------------------------------------------------------|-------------------------------|---------------------------------|----------------------|
|                                                       | GG<br>n=5268                  | GA and AA <sup>1</sup><br>n=160 |                      |
| Age, mean years (SD)                                  | 67.6 (6.5)                    | 66.9 (5.8)                      | 0.07                 |
| Women, n (%)                                          | 2763 (52.5)                   | 80 (50.0)                       | 0.61                 |
| Low Socioeconomic status <sup>3</sup> , n (%)         | 1184 (22.5)                   | 31 (19.4)                       | 0.36                 |
| Ever use of tobacco, n (%)                            | 3250 (61.7)                   | 99 (61.9)                       | 0.97                 |
| Biomass fuel use, mean years (SD)                     | 47.5 (13.3)                   | 46.7 (14.3)                     | 0.64                 |
| High Sun exposure <sup>4</sup> n (%)                  | 1286 (24.4)                   | 38 (23.8)                       | 0.86                 |
| Body Mass Index $\geq 25$ kg/square metre, n (%)      | 856 (16.3)                    | 31 (19.5)                       | 0.30                 |
| Moderate and severe malnutrition <sup>5</sup> , n (%) | 790 (15.0)                    | 16 (10.0)                       | 0.07                 |
| Diabetes <sup>6</sup> , n (%)                         | 268 (5.1)                     | 8 (5.0)                         | 0.96                 |
| Cholesterol ( $\mu$ mol/L) mean (SD)                  | 4.52 (1.06)                   | 4.66 (0.96)                     | 0.15                 |
| Diastolic Blood pressure (mm/Hg), mean (SD)           | 74.1 (13.3)                   | 73.5 (14.7)                     | 0.69                 |

<sup>1</sup> 157 participants with GA genotype and 3 participants with AA genotype.

<sup>2</sup> p-value for difference between genotype (GG versus GA plus AA) calculated from Design-based Pearson Chi- squared test for categorical variables and Design adjusted Wald test for continuous variables.

<sup>3</sup> lowest quintile of the socio-economic score derived using principal component analysis (based on caste, landholding, roof type, number of rooms) and categorized by quintiles.

<sup>4</sup> highest quartile of midday sun exposure calculated from questionnaire responses on time spent outdoors at different over job and life periods and categorized by quartiles.

<sup>5</sup> Moderate and severe malnutrition defined as mid-upper arm circumference ( $<22$  in men and  $<20$  in women).

<sup>6</sup> Diabetes defined as blood glucose  $\geq 200$  mg/dl
