# Supplementary material for: Genetic variants in a sodium-dependent vitamin C transporter gene and age-related cataract
Source: PubMed Central journal article supplement (PMC6709767; doi:10.1136/bjophthalmol-2018-312257), 2018-11-15
Supplement: bjophthalmol-2018-312257supp003.pdf [file bjophthalmol-2018-312257supp003.pdf]

**Supplementary Table 1. SLC23A1/2 Single Nucleotide Polymorphisms, Location, Alleles, Molecular consequences, Minor Allele Frequencies (MAFs) and Hardy Weinberg Equilibrium tests for participants in the India age-related Eye Disease population study (INDEYE) with corresponding reported MAFs in the 1000 genomes project in South Asian and European populations**

| SNP <sup>1</sup>                | Location    | Major/Minor Allele | Molecular consequences         | HWE <sup>2</sup> | MAF <sup>3</sup> | MAF SAS <sup>4</sup> | MAF EUR <sup>5</sup> |
|---------------------------------|-------------|--------------------|--------------------------------|------------------|------------------|----------------------|----------------------|
| <i>SLC23A1</i><br>Chromosome 5  |             |                    |                                |                  |                  |                      |                      |
| rs33972313                      | 139.379.813 | G/A                | Exon 8<br>Missense variant.    | 0.1214           | 0.0150           | 0.0143               | 0.0348               |
| rs4257763                       | 139.378.470 | G/A                | Intron                         | 0.3296           | 0.4754           | 0.4990               | 0.6262               |
| rs6596473                       | 139.374.887 | G/C                | Intron                         | 0.3630           | 0.4488           | 0.4775               | 0.3410               |
| rs10063949                      | 139.383.837 | T/C                | Intron<br>2KB upstream variant | 0.3994           | 0.4611           | 0.4826               | 0.3817               |
| <i>SLC23A2</i><br>Chromosome 20 |             |                    |                                |                  |                  |                      |                      |
| rs12479919                      | 5.000.094   | C/T                | Intron                         | 0.004            | 0.2826           | 0.2894               | 0.3658               |

<sup>1</sup> Single Nucleotide Polymorphism

<sup>2</sup> p value for departure from Hardy Weinberg Equilibrium (HWE)

<sup>3</sup> Minor Allele Frequency (MAF) INDEYE Study

<sup>4</sup> Minor Allele Frequency (MAF from 1000 genome study for South Asian ancestry available in <https://www.ncbi.nlm.nih.gov/snp> accessed 14 June 2018

<sup>5</sup> Minor Allele Frequency (MAF) from 1000 genome study for European ancestry available in <https://www.ncbi.nlm.nih.gov/snp> accessed 14 June 2018
